# Supplementary material for: Bedaquiline Eliminates Bactericidal Activity of β-Lactams against Mycobacterium abscessus
Source: PubMed Central journal article supplement (PMC6658768; doi:10.1128/aac.00827-19), 2019-07-25
Supplement: AAC.00827-19-s0001.pdf [file AAC.00827-19-s0001.pdf]

1 Supplemental materials

2 Bedaquiline eliminates bactericidal activity of  $\beta$ -lactams against *Mycobacterium abscessus*

3 Marissa Lindman and Thomas Dick

4 Supplemental Figure 1

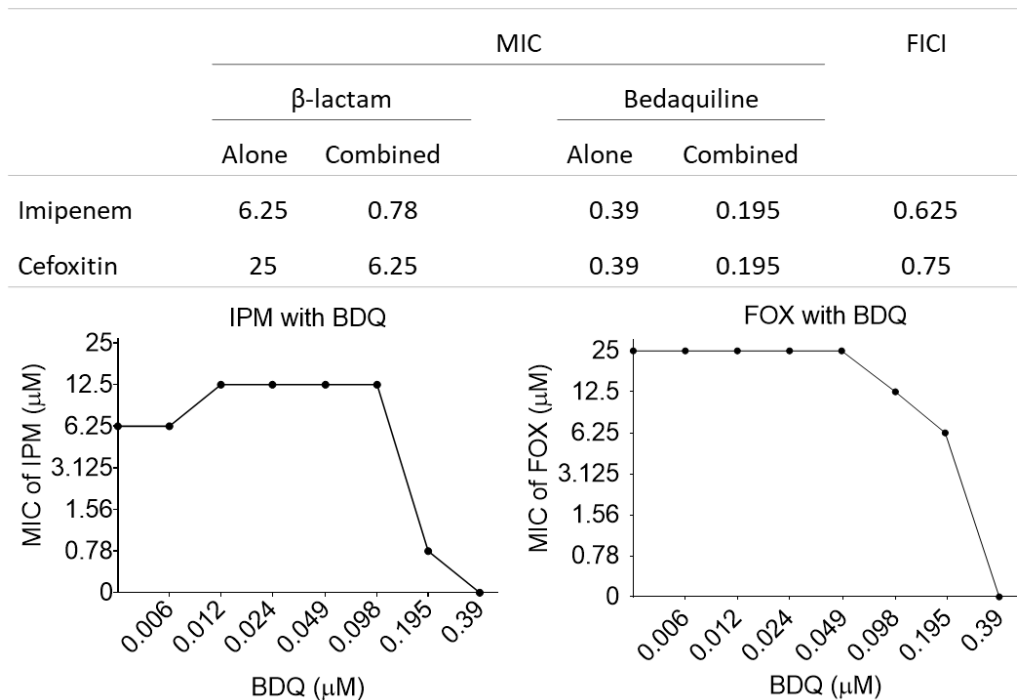

6 Figure S1 Effect of combination of  $\beta$ -lactams and bedaquiline on growth of *M. abscessus*.

7 Results of checker board analyses are shown. The checker board assay was carried out as

8 described previously (1, 2). Synergy is defined as  $FICI \leq 0.5$ , indifference is defined as  $0.5 <$

9  $FICI \leq 4$ , and antagonism is defined as  $FICI > 4$  (2). For drug abbreviations see Figure 1. The

10 experiment was carried out twice and a representative example is shown.

11 REFERENCES

- 12 1. Aziz DB, Teo JWP, Dartois V, Dick T. 2018. Teicoplanin – Tigecycline Combination Shows Synergy  
13 Against Mycobacterium abscessus. *Frontiers in Microbiology* 9.
- 14 2. Hsieh MH, Yu CM, Yu VL, Chow JW. 1993. Synergy assessed by checkerboard a critical analysis.  
15 *Diagnostic Microbiology and Infectious Disease* 16:343-349.

16
